# Supplementary material for: Targetable ERBB2 mutation status is an independent marker of adverse prognosis in estrogen receptor positive, ERBB2 non-amplified primary lobular breast carcinoma: a retrospective in silico analysis of public datasets
Source: PubMed Central journal article supplement (PMC7422515; doi:10.1186/s13058-020-01324-4), 2020-08-11
Supplement: 13058_2020_1324_MOESM2_ESM.pdf [file 13058_2020_1324_MOESM2_ESM.pdf]

**Table S1:** HER2 gene signatures: (i) Novel and (ii) Established by Desmedt *et al* 2008 (31). Pearson R [neratinib] is the correlation with neratinib response using a pharmacogenomic model of breast cancer cell lines (accessed online *via* CellMinerCDB). \*indicates significantly correlated genes. n/a = data not available in CellMinerCDB

| Genesig          | N     | Gene ID  | Pearson R [neratinib] | p-value   |
|------------------|-------|----------|-----------------------|-----------|
| (i) Novel        | 20    | ERBB2    | 0.77                  | 1.90E-08* |
|                  |       | SPDEF    | 0.45                  | 4.20E-03* |
|                  |       | TFAP2B   | 0.2                   | 0.24      |
|                  |       | CD24     | 0.38                  | 0.019*    |
|                  |       | SERHL2   | 0.41                  | 0.0097*   |
|                  |       | CNTNAP2  | 0.12                  | 0.47      |
|                  |       | RPL19    | 0.29                  | 0.073     |
|                  |       | CAPN13   | 0.51                  | 1.00E-03* |
|                  |       | RPL23    | 0.22                  | 0.18      |
|                  |       | LRRC26   | n/a                   | n/a       |
|                  |       | PRODH    | 0.42                  | 9.00E-03* |
|                  |       | GPRC5C   | 0.44                  | 0.0056*   |
|                  |       | GGCT     | 0.38                  | 1.90E-02* |
|                  |       | CLCA2    | 0.31                  | 5.70E-02  |
|                  |       | KDM5B    | 0.33                  | 4.20E-02* |
|                  |       | SPP1     | -0.25                 | 1.30E-01  |
|                  |       | PHLDA1   | -0.54                 | 5.30E-04* |
|                  |       | C15orf48 | 0.06                  | 7.10E-01  |
|                  |       | SUSD3    | -0.09                 | 5.90E-01  |
|                  |       | SERPINA1 | 0.14                  | 4.10E-01  |
| (ii) Established | 24    | ERBB2    | 0.77                  | 1.90E-08* |
|                  |       | PERLD1   | 0.77                  | 1.20E-08* |
|                  |       | PSMD3    | 0.33                  | 0.04*     |
|                  |       | PNMT     | 0.33                  | 4.20E-02* |
|                  |       | GSDML    | 0.4                   | 1.40E-02* |
|                  |       | CASC3    | 0.26                  | 0.11      |
|                  |       | LASP1    | 0.32                  | 0.049*    |
|                  |       | WIPF2    | 0.27                  | 9.70E-02  |
|                  |       | EPN3     | 0.42                  | 8.50E-03* |
|                  |       | PHB      | 0.38                  | 0.019*    |
|                  |       | CLCA2    | 0.31                  | 5.70E-02  |
|                  |       | ORMDL2   | 0.06                  | 0.74      |
|                  |       | RAP1GAP  | 0.53                  | 0.00059*  |
|                  |       | CUEDC1   | 0.09                  | 0.61      |
|                  |       | HOXC11   | 0.2                   | 0.23      |
|                  |       | CYP2J2   | 0.45                  | 0.0044*   |
|                  |       | HGD      | 0.14                  | 0.39      |
|                  |       | ABCA12   | 0.07                  | 0.67      |
|                  |       | ATP2C2   | 0.42                  | 0.0096*   |
|                  |       | ITGA3    | 0                     | 0.98      |
|                  |       | CEACAM5  | 0.4                   | 0.012*    |
|                  |       | TMEM16K  | 0.15                  | 0.37      |
|                  |       | NR1D1    | n/a                   | n/a       |
|                  |       | SNX7     | -0.28                 | 0.092     |
|                  |       | FJX1     | -0.26                 | 0.12      |
|                  |       | KCTD9    | -0.11                 | 0.53      |
| PCK3             | -0.04 | 0.83     |                       |           |
| CREG1            | 0.17  | 0.3      |                       |           |

**Table S2:** Up-regulated genes from the top 500 DEGs for each comparison by WAD score

| <b>METABRIC</b><br><b>ERBB2amp</b> | <b>METABRIC</b><br><b>ERBB2mut</b> | <b>METABRIC</b><br><b>oncERBB2mut</b> | <b>TCGA</b><br><b>HER2+</b> |
|------------------------------------|------------------------------------|---------------------------------------|-----------------------------|
| <i>ERBB2</i>                       | <i>PIP</i>                         | <i>ANKRD30A</i>                       | <i>ERBB2</i>                |
| <i>GRB7</i>                        | <i>CYP4Z1</i>                      | <i>CYP4Z1</i>                         | <i>SCGB2A2</i>              |
| <i>PGAP3</i>                       | <i>PROM1</i>                       | <i>LRRC26</i>                         | <i>SPDEF</i>                |
| <i>GSDMB</i>                       | <i>CD24</i>                        | <i>PPP1R1B</i>                        | <i>FOXA1</i>                |
| <i>PPP1R1B</i>                     | <i>GSTM2</i>                       | <i>PIP</i>                            | <i>TFF3</i>                 |
| <i>CD24</i>                        | <i>CYP4X1</i>                      | <i>LIMCH1</i>                         | <i>TFAP2B</i>               |
| <i>LAD1</i>                        | <i>ANKRD30A</i>                    | <i>UGT2B7</i>                         | <i>ABCC11</i>               |
| <i>ORMDL3</i>                      | <i>PPP1R1B</i>                     | <i>COL4A5</i>                         | <i>ALDH3B2</i>              |
| <i>STARD3</i>                      | <i>BAMBI</i>                       | <i>UGT2B11</i>                        | <i>FGFR4</i>                |
| <i>S100P</i>                       | <i>AGL</i>                         | <i>BAMBI</i>                          | <i>BCAS1</i>                |
| <i>C17orf37</i>                    | <i>IRX2</i>                        | <i>CFB</i>                            | <i>CEACAM6</i>              |
| <i>LRRC26</i>                      | <i>VTCN1</i>                       | <i>TFAP2B</i>                         | <i>KCNK1</i>                |
| <i>S100A8</i>                      | <i>LIMCH1</i>                      | <i>CYP4X1</i>                         | <i>CEACAM5</i>              |
| <i>MED1</i>                        | <i>NDP</i>                         | <i>RAP1GAP</i>                        | <i>ORMDL3</i>               |
| <i>CBX2</i>                        | <i>LAD1</i>                        | <i>C9orf152</i>                       | <i>C17orf37</i>             |
| <i>CALML5</i>                      | <i>RPL23</i>                       | <i>ABCC11</i>                         | <i>CD24</i>                 |
| <i>MED24</i>                       | <i>C9orf152</i>                    | <i>AGR3</i>                           | <i>PGAP3</i>                |
| <i>KRT7</i>                        | <i>TFAP2B</i>                      | <i>AGL</i>                            | <i>GRB7</i>                 |
| <i>RPL19</i>                       | <i>DSP</i>                         | <i>DDX17</i>                          | <i>HOXC10</i>               |
| <i>SDC1</i>                        | <i>KDM5B</i>                       | <i>GSTM2</i>                          | <i>AGR2</i>                 |
| <i>C1orf106</i>                    | <i>PRODH</i>                       | <i>DACH1</i>                          | <i>C9orf152</i>             |
| <i>DQ893812</i>                    | <i>RPL9</i>                        | <i>NFIA</i>                           | <i>AR</i>                   |
| <i>IDH2</i>                        | <i>RPL39</i>                       | <i>CAPN13</i>                         | <i>STARD3</i>               |
| <i>FBXL20</i>                      | <i>CLCA2</i>                       | <i>FOXA1</i>                          | <i>PRR15</i>                |
| <i>BAMBI</i>                       | <i>RPS27A</i>                      | <i>SLC12A2</i>                        | <i>SERHL2</i>               |
| <i>KCNK1</i>                       | <i>LRRC26</i>                      | <i>SERHL2</i>                         | <i>PSMD3</i>                |
| <i>SUSD2</i>                       | <i>RPS23</i>                       | <i>CLCA2</i>                          | <i>CNTNAP2</i>              |
| <i>TMEM132A</i>                    | <i>NFIB</i>                        | <i>IRX2</i>                           | <i>GALNT6</i>               |
| <i>PSMD3</i>                       | <i>RPS27</i>                       | <i>UGT2B28</i>                        | <i>TOB1</i>                 |
| <i>PSMB3</i>                       | <i>HMGCS2</i>                      | <i>DKFZp761K0816</i>                  | <i>DHRS2</i>                |
| <i>MLLT6</i>                       | <i>XIST</i>                        | <i>PRODH</i>                          | <i>ITGB6</i>                |
| <i>CDC20</i>                       | <i>U79293</i>                      | <i>SCGB1D2</i>                        | <i>SCGB1D2</i>              |
| <i>SOX11</i>                       | <i>UAP1</i>                        | <i>KLHDC2</i>                         | <i>HS6ST3</i>               |
| <i>GLYATL2</i>                     | <i>NQO1</i>                        | <i>HMGCS2</i>                         | <i>KITLG</i>                |
| <i>SLC7A5</i>                      | <i>RPS4X</i>                       | <i>HPX</i>                            | <i>PRLR</i>                 |

|                 |                 |                 |                 |
|-----------------|-----------------|-----------------|-----------------|
| <i>TFRC</i>     | <i>RAB27B</i>   | <i>SH3BGRL</i>  | <i>ACSS3</i>    |
| <i>RPL23</i>    | <i>RPL37A</i>   | <i>LCOR</i>     | <i>RPL19</i>    |
| <i>DBNDD1</i>   | <i>DUSP6</i>    | <i>NOSTRIN</i>  | <i>ABCA12</i>   |
| <i>S100A9</i>   | <i>DDX17</i>    | <i>MUC1</i>     | <i>MED1</i>     |
| <i>PROM1</i>    | <i>ARGLU1</i>   | <i>RTN4</i>     | <i>HOXC11</i>   |
| <i>UBE2C</i>    | <i>KRT7</i>     | <i>SPINK8</i>   | <i>TIMP3</i>    |
| <i>G6PD</i>     | <i>GSTP1</i>    | <i>ARGLU1</i>   | <i>CMBL</i>     |
| <i>LASP1</i>    | <i>UGDH</i>     | <i>PPFIBP2</i>  | <i>C1orf115</i> |
| <i>SCD</i>      | <i>MAP3K1</i>   | <i>HNRNPA1</i>  | <i>ETNK2</i>    |
| <i>CYB561</i>   | <i>MPZL2</i>    | <i>EFCAB4A</i>  | <i>MUM1L1</i>   |
| <i>CDK12</i>    | <i>SLC38A2</i>  | <i>MAP3K1</i>   | <i>CYP2J2</i>   |
| <i>SERHL2</i>   | <i>AGR3</i>     | <i>SLC38A1</i>  | <i>FASN</i>     |
| <i>ULK1</i>     | <i>LCOR</i>     | <i>SMARCA2</i>  | <i>COL12A1</i>  |
| <i>PHGDH</i>    | <i>RPL5</i>     | <i>TFF3</i>     | <i>TOM1L1</i>   |
| <i>NOTCH3</i>   | <i>PROM2</i>    | <i>PJA2</i>     | <i>RNF43</i>    |
| <i>CAPN13</i>   | <i>ARL6IP5</i>  | <i>GPC4</i>     | <i>CYP4Z2P</i>  |
| <i>PFKP</i>     | <i>DCP2</i>     | <i>TBC1D9</i>   | <i>HOXB13</i>   |
| <i>CAPS</i>     | <i>ZFP36L1</i>  | <i>UBE3A</i>    | <i>HOTAIR</i>   |
| <i>KRT8</i>     | <i>EFCAB4A</i>  | <i>ATP1B1</i>   | <i>CLTC</i>     |
| <i>CDR2L</i>    | <i>OGT</i>      | <i>GPRC5C</i>   | <i>IGFBP5</i>   |
| <i>TUBB3</i>    | <i>SPINK8</i>   | <i>REEP1</i>    | <i>NCAM2</i>    |
| <i>TLCD1</i>    | <i>RPL31</i>    | <i>ACSL3</i>    | <i>TC2N</i>     |
| <i>DBN1</i>     | <i>CCDC14</i>   | <i>TSPAN13</i>  | <i>DUSP4</i>    |
| <i>CLCA2</i>    | <i>F11R</i>     | <i>THUMPD1</i>  | <i>CAPN13</i>   |
| <i>N4BP2L2</i>  | <i>BNIP1</i>    | <i>UAP1</i>     | <i>C1orf64</i>  |
| <i>FOXO3</i>    | <i>GSTM1</i>    | <i>MOBK13</i>   | <i>GPR160</i>   |
| <i>FLJ40504</i> | <i>RPL7</i>     | <i>RAB27B</i>   | <i>CDK12</i>    |
| <i>PSME4</i>    | <i>PTMA</i>     | <i>CXADR</i>    | <i>POF1B</i>    |
| <i>CASC3</i>    | <i>SHISA2</i>   | <i>LMTK3</i>    | <i>SCGB2A1</i>  |
| <i>TOP2A</i>    | <i>MOBK13</i>   | <i>ARL6IP5</i>  | <i>SLC4A8</i>   |
| <i>C11orf80</i> | <i>RAP1GAP</i>  | <i>RPL9</i>     | <i>MOSC1</i>    |
| <i>TFAP2B</i>   | <i>UGT2B11</i>  | <i>KIAA1370</i> | <i>MMP11</i>    |
| <i>EIF2C2</i>   | <i>GMFB</i>     | <i>MLPH</i>     | <i>HPGD</i>     |
| <i>PDXK</i>     | <i>YES1</i>     | <i>LANCL1</i>   | <i>TSKU</i>     |
| <i>HMGB3</i>    | <i>FLJ40504</i> | <i>PROM2</i>    | <i>TRIM36</i>   |
| <i>TRIB3</i>    | <i>PPFIBP2</i>  | <i>RPS23</i>    | <i>MGST1</i>    |
| <i>ADAM15</i>   | <i>CNN3</i>     | <i>INPP5J</i>   | <i>AIM1</i>     |
| <i>S100A16</i>  | <i>RPL19</i>    | <i>PROM1</i>    | <i>THRSP</i>    |

|                 |                  |                 |                 |
|-----------------|------------------|-----------------|-----------------|
| <i>ASS1</i>     | <i>GOLGA8B</i>   | <i>U79293</i>   | <i>SIX1</i>     |
| <i>ASPM</i>     | <i>RPL26</i>     | <i>NTN4</i>     | <i>GSTM3</i>    |
| <i>GPRC5C</i>   | <i>ZNF827</i>    | <i>REEP6</i>    | <i>MFAP5</i>    |
| <i>PPP1R10</i>  | <i>PHGDH</i>     | <i>GOLGA8B</i>  | <i>ZNF652</i>   |
| <i>CACNB3</i>   | <i>PRKAR1A</i>   | <i>SLC38A2</i>  | <i>RPL23</i>    |
| <i>HES4</i>     | <i>STYX</i>      | <i>ECHDC2</i>   | <i>LRRC26</i>   |
| <i>PPP1R14B</i> | <i>LOC442454</i> | <i>TC2N</i>     | <i>ERBB4</i>    |
| <i>RANGAP1</i>  | <i>A2M</i>       | <i>HIGD1A</i>   | <i>COL11A1</i>  |
| <i>FLOT2</i>    | <i>RPS7</i>      | <i>DUSP6</i>    | <i>POSTN</i>    |
| <i>PROM2</i>    | <i>NACA</i>      | <i>KIAA1671</i> | <i>MOSC2</i>    |
| <i>GALE</i>     | <i>SERHL2</i>    | <i>AZGP1</i>    | <i>NPNT</i>     |
| <i>YES1</i>     | <i>ATP1B1</i>    | <i>TP53INP1</i> | <i>PRODH</i>    |
| <i>UBQLN4</i>   | <i>MGEA5</i>     | <i>GMFB</i>     | <i>PECI</i>     |
| <i>PNMT</i>     | <i>COL4A5</i>    | <i>ALCAM</i>    | <i>RIMS1</i>    |
| <i>FAT1</i>     | <i>RPS3A</i>     | <i>REEP5</i>    | <i>INPP4B</i>   |
| <i>CDC45</i>    | <i>PABPC1</i>    | <i>CRIP2</i>    | <i>SLC9A2</i>   |
| <i>KDM5B</i>    | <i>CAMSAP1L1</i> | <i>ACACA</i>    | <i>CXCL17</i>   |
| <i>EZR</i>      | <i>P4HA1</i>     | <i>DSTN</i>     | <i>RND1</i>     |
| <i>NME1</i>     | <i>TROVE2</i>    | <i>OGT</i>      | <i>CREB3L4</i>  |
| <i>LFNG</i>     | <i>REEP5</i>     | <i>ZNF827</i>   | <i>SLC2A10</i>  |
| <i>SMARCA4</i>  | <i>CXADR</i>     | <i>EIF3A</i>    | <i>PLCB4</i>    |
| <i>PRODH</i>    | <i>EIF3A</i>     | <i>ZNF91</i>    | <i>FLT3</i>     |
| <i>PRSS8</i>    | <i>RTN4</i>      | <i>ENPP5</i>    | <i>MGAT4A</i>   |
| <i>GGCT</i>     | <i>LUC7L3</i>    | <i>RPL23</i>    | <i>CTNND2</i>   |
| <i>PCGF2</i>    | <i>ZRANB2</i>    | <i>PPA2</i>     | <i>RET</i>      |
| <i>NUSAP1</i>   | <i>SEC61G</i>    | <i>MYB</i>      | <i>AFF3</i>     |
| <i>RPS6KB2</i>  | <i>EZR</i>       | <i>SCGB2A2</i>  | <i>GATA2</i>    |
| <i>C10orf81</i> | <i>UBE3A</i>     | <i>KCNMA1</i>   | <i>SDR16C5</i>  |
| <i>RPS6KB1</i>  | <i>GGCT</i>      | <i>ESRRG</i>    | <i>C17orf28</i> |
| <i>SLC9A3R1</i> | <i>UGT2B7</i>    | <i>N4BP2L2</i>  | <i>MYO1B</i>    |
| <i>CR613620</i> | <i>GSTO2</i>     | <i>PDE4B</i>    | <i>FA2H</i>     |
| <i>ITPR3</i>    | <i>LANCL1</i>    | <i>MGEA5</i>    | <i>CDC6</i>     |
| <i>SLC38A2</i>  | <i>MGP</i>       | <i>HNRNPA0</i>  | <i>IYD</i>      |
| <i>LUC7L3</i>   | <i>HMG2</i>      | <i>CADPS2</i>   | <i>MSL1</i>     |
| <i>MIF</i>      | <i>XPR1</i>      | <i>CYP4Z2P</i>  | <i>TMEM150C</i> |
| <i>SLC25A1</i>  | <i>TRA2B</i>     | <i>CKMT1B</i>   | <i>SEPP1</i>    |
| <i>GAPDH</i>    | <i>SH3BGRL</i>   | <i>ABLIM1</i>   | <i>ALCAM</i>    |
| <i>INF2</i>     | <i>KLHDC2</i>    | <i>ZNF302</i>   | <i>NAP1L2</i>   |

|                  |                 |                 |                 |
|------------------|-----------------|-----------------|-----------------|
| <i>KRT81</i>     | <i>RFWD2</i>    | <i>LGALS8</i>   | <i>PVALB</i>    |
| <i>TRAF3IP2</i>  | <i>SERTAD4</i>  | <i>TTC3</i>     | <i>ERGIC1</i>   |
| <i>PPFIBP2</i>   | <i>PPA2</i>     | <i>SH3BP4</i>   | <i>XBP1</i>     |
| <i>LOC388152</i> | <i>MIF</i>      | <i>FAM98A</i>   | <i>GPRC5C</i>   |
| <i>PHB</i>       | <i>ZNF302</i>   | <i>MYO1B</i>    | <i>HPX</i>      |
| <i>TMC6</i>      | <i>ACLY</i>     | <i>FH</i>       | <i>DACH1</i>    |
| <i>SNF8</i>      | <i>ANO1</i>     | <i>KDM5B</i>    | <i>PHLDB2</i>   |
| <i>AKT1</i>      | <i>LARP4</i>    | <i>ECI2</i>     | <i>FAM3B</i>    |
| <i>38777</i>     | <i>GPC4</i>     | <i>XPR1</i>     | <i>SLC16A14</i> |
| <i>C17orf28</i>  | <i>CDC42SE1</i> | <i>UGDH</i>     | <i>SERHL</i>    |
| <i>KIAA0182</i>  | <i>INPP5J</i>   | <i>ZFP36L1</i>  | <i>ATP13A4</i>  |
| <i>INTS8</i>     | <i>SREK1</i>    | <i>F11R</i>     | <i>KRT18</i>    |
| <i>SBK1</i>      | <i>CALM2</i>    | <i>PNPLA7</i>   | <i>NQO1</i>     |
| <i>CCDC6</i>     | <i>ERBB2</i>    | <i>SREK1</i>    | <i>FBN1</i>     |
| <i>VMP1</i>      | <i>THUMPD1</i>  | <i>AK025793</i> | <i>MAP9</i>     |
| <i>TP53I13</i>   | <i>HSPA2</i>    | <i>FEM1C</i>    | <i>OSBPL6</i>   |
| <i>HMGCS1</i>    | <i>UBQLN4</i>   | <i>FAM13B</i>   | <i>SDC1</i>     |
| <i>PTTG1</i>     | <i>RBM25</i>    | <i>KTN1</i>     | <i>TM7SF2</i>   |
| <i>FAM38A</i>    | <i>SCGB1D2</i>  | <i>LRIG1</i>    | <i>PRKACB</i>   |
| <i>MUC1</i>      | <i>PPP1CB</i>   | <i>DBNDD1</i>   | <i>RHOB</i>     |
| <i>SNAR-A3</i>   | <i>TP53INP1</i> | <i>DBI</i>      | <i>TMEM86A</i>  |
| <i>STIP1</i>     | <i>SMARCA2</i>  | <i>CMPK1</i>    | <i>LUM</i>      |
| <i>C22orf36</i>  | <i>PJA2</i>     | <i>GLCE</i>     | <i>FAM84B</i>   |
| <i>MMP9</i>      | <i>ROD1</i>     | <i>CR610863</i> | <i>SLC7A2</i>   |
| <i>CMTM4</i>     | <i>SNX14</i>    | <i>ARHGAP32</i> | <i>LASS6</i>    |
| <i>PTRH2</i>     | <i>STK36</i>    | <i>PRKAA1</i>   | <i>SBNO1</i>    |
| <i>LIMCH1</i>    | <i>NKTR</i>     | <i>SLC26A3</i>  | <i>CRISP3</i>   |
| <i>NFIB</i>      | <i>RPS6</i>     | <i>XIST</i>     | <i>PHB</i>      |
| <i>LDLR</i>      | <i>MYO1B</i>    | <i>DCP2</i>     | <i>UNC5A</i>    |
| <i>LMTK3</i>     | <i>SCARB2</i>   | <i>NXPH1</i>    | <i>F13A1</i>    |
| <i>FAM110A</i>   | <i>CYB5R2</i>   | <i>IGSF21</i>   | <i>PNMT</i>     |
| <i>PXDN</i>      | <i>GDI2</i>     | <i>RPS27A</i>   | <i>S1PR3</i>    |
| <i>COL7A1</i>    | <i>FH</i>       | <i>RPS4X</i>    | <i>INPP5J</i>   |
| <i>CARM1</i>     | <i>SLC30A7</i>  | <i>TM9SF2</i>   | <i>ALOX15B</i>  |
| <i>HMGA1</i>     | <i>MGC24103</i> | <i>PRRC1</i>    | <i>CD55</i>     |
| <i>RAP1GAP</i>   | <i>FAM98A</i>   | <i>ATP1A1</i>   | <i>EPN3</i>     |
| <i>EFCAB4A</i>   | <i>RNF144B</i>  | <i>CUL4A</i>    | <i>SCD</i>      |
| <i>CWC25</i>     | <i>SLC38A1</i>  | <i>TRA2B</i>    | <i>CREB3L1</i>  |

|                 |                 |                  |                 |
|-----------------|-----------------|------------------|-----------------|
| <i>FER1L4</i>   | <i>HNRNPA0</i>  | <i>FKBP3</i>     | <i>GGCT</i>     |
| <i>RAPGEFL1</i> | <i>KTN1</i>     | <i>CR613620</i>  | <i>CLCA2</i>    |
| <i>CCNB2</i>    | <i>ETS1</i>     | <i>ZRANB2</i>    | <i>RPS6KB1</i>  |
| <i>SEMA4B</i>   | <i>TC2N</i>     | <i>TMEM62</i>    | <i>TMC5</i>     |
| <i>MRPL27</i>   | <i>ACACA</i>    | <i>C3orf14</i>   | <i>PAX9</i>     |
| <i>NCK2</i>     | <i>PRRC2C</i>   | <i>LUC7L3</i>    | <i>VCAN</i>     |
| <i>CNTNAP2</i>  | <i>NARS</i>     | <i>CCNO</i>      | <i>SPTLC2</i>   |
| <i>EPPK1</i>    | <i>KIAA0528</i> | <i>MKNK2</i>     | <i>CXCL9</i>    |
| <i>C4orf48</i>  | <i>RHOB</i>     | <i>ARPP19</i>    | <i>ACSL3</i>    |
| <i>RARA</i>     | <i>DCUN1D4</i>  | <i>PTEN</i>      | <i>CBX2</i>     |
| <i>PABPC1</i>   | <i>MAP3K6</i>   | <i>ANAPC13</i>   | <i>PDE10A</i>   |
| <i>EDARADD</i>  | <i>MYB</i>      | <i>NARS</i>      | <i>IQGAP2</i>   |
| <i>SLC5A6</i>   | <i>TMEM62</i>   | <i>KIAA1598</i>  | <i>GATA3</i>    |
| <i>SPDEF</i>    | <i>INTS8</i>    | <i>CCDC6</i>     | <i>SLC16A2</i>  |
| <i>LPCAT1</i>   | <i>RPS15</i>    | <i>A2M</i>       | <i>CDH2</i>     |
| <i>MLLT4</i>    | <i>LEMD3</i>    | <i>EVL</i>       | <i>WIPF2</i>    |
| <i>YWHAG</i>    | <i>PTPRK</i>    | <i>SPDEF</i>     | <i>MORC4</i>    |
| <i>NPIPL3</i>   | <i>LGALS8</i>   | <i>SNX14</i>     | <i>PRR15L</i>   |
| <i>PSMC5</i>    | <i>EIF4A2</i>   | <i>PTMA</i>      | <i>MLPH</i>     |
| <i>TRPV6</i>    | <i>UBE2Q2</i>   | <i>CAMSAP1L1</i> | <i>KIAA1244</i> |
| <i>PODXL2</i>   | <i>TRIP12</i>   | <i>C7orf41</i>   | <i>EMB</i>      |
| <i>DDIT4</i>    | <i>PPP1R3C</i>  | <i>NPTN</i>      | <i>COL10A1</i>  |
| <i>FLAD1</i>    | <i>YWHAG</i>    | <i>RPL3</i>      | <i>KIAA2022</i> |
| <i>ABLIM1</i>   | <i>THOC2</i>    | <i>RPL5</i>      | <i>ENPP1</i>    |
| <i>LCN2</i>     | <i>EIF4B</i>    | <i>CBX6</i>      | <i>SOX11</i>    |
| <i>CDCA5</i>    | <i>SOCS2</i>    | <i>RPS26</i>     | <i>NRK</i>      |
| <i>FAM60A</i>   | <i>NOTCH3</i>   | <i>DCTN4</i>     | <i>F2RL2</i>    |
| <i>ARFGAP1</i>  | <i>STK32B</i>   | <i>TJP1</i>      | <i>COL6A3</i>   |
| <i>RCC2</i>     | <i>C8orf59</i>  | <i>RCOR3</i>     | <i>ADRA2C</i>   |
| <i>SNAPC4</i>   | <i>MST4</i>     | <i>TSC1</i>      | <i>PARM1</i>    |
| <i>VPS37B</i>   | <i>CR613620</i> | <i>CALM2</i>     | <i>C2orf72</i>  |
| <i>COMT</i>     | <i>RPL3</i>     | <i>KIAA0353</i>  | <i>NME1</i>     |
| <i>SPINK8</i>   | <i>RPS11</i>    | <i>ERBB3</i>     | <i>SCARB2</i>   |
| <i>S100A11</i>  | <i>KCNMA1</i>   | <i>VANGL2</i>    | <i>F7</i>       |
| <i>E2F2</i>     | <i>TTC3</i>     | <i>FLJ40504</i>  | <i>FBXL20</i>   |
| <i>RHPN2</i>    | <i>UGT2B28</i>  | <i>SAR1A</i>     | <i>TMEM45B</i>  |
| <i>MTMR4</i>    | <i>FNBP1L</i>   | <i>RHOB</i>      | <i>RHOBTB3</i>  |
| <i>CHFR</i>     | <i>SRSF1</i>    | <i>NACA</i>      | <i>GGT1</i>     |

|               |                 |             |                 |
|---------------|-----------------|-------------|-----------------|
| <i>FAM98A</i> | <i>CYP4Z2P</i>  | <i>FTH1</i> | <i>FAM108C1</i> |
|               | <i>HNRNPA1</i>  | <i>ESR1</i> | <i>SRD5A3</i>   |
|               | <i>NOSTRIN</i>  |             | <i>PCDHB8</i>   |
|               | <i>FEM1C</i>    |             | <i>AGL</i>      |
|               | <i>TMEM132A</i> |             | <i>TGFBR1</i>   |
|               | <i>FBXO11</i>   |             | <i>MED24</i>    |
|               | <i>PRKAA1</i>   |             | <i>KIAA1324</i> |
|               | <i>SOX4</i>     |             | <i>ARHGAP8</i>  |
|               | <i>RHPN2</i>    |             | <i>CLGN</i>     |
|               | <i>CNTNAP2</i>  |             | <i>ST3GAL5</i>  |
|               | <i>RCOR3</i>    |             | <i>HS6ST2</i>   |
|               | <i>PERP</i>     |             | <i>IDI1</i>     |
|               | <i>CDC16</i>    |             | <i>SPRED2</i>   |
|               | <i>HNRPDL</i>   |             | <i>GSR</i>      |
|               | <i>ABCC11</i>   |             | <i>DHX40</i>    |
|               | <i>FOXA1</i>    |             | <i>KIAA1199</i> |
|               | <i>SUZ12</i>    |             | <i>TMTC3</i>    |
|               | <i>ACSL3</i>    |             | <i>GPNMB</i>    |
|               | <i>C1orf106</i> |             | <i>ISOC1</i>    |
|               | <i>RPL15</i>    |             | <i>THSD4</i>    |
|               | <i>WASL</i>     |             | <i>G3BP2</i>    |
|               | <i>PSME4</i>    |             | <i>ACSL1</i>    |
|               | <i>TFAP2A</i>   |             | <i>CATSPERB</i> |
|               | <i>EXOSC10</i>  |             | <i>MARCKS</i>   |
|               | <i>LPP</i>      |             | <i>TPD52L1</i>  |
|               | <i>STX6</i>     |             | <i>GPR137B</i>  |
|               | <i>SERBP1</i>   |             | <i>CD164</i>    |
|               | <i>SUCLG2</i>   |             | <i>PDE4B</i>    |
|               | <i>CCBL2</i>    |             | <i>FN1</i>      |
|               | <i>PRRC1</i>    |             | <i>PP14571</i>  |
|               | <i>DQ893812</i> |             | <i>ACER3</i>    |
|               | <i>DARS</i>     |             | <i>TSC22D3</i>  |
|               | <i>RPL36A</i>   |             | <i>ATP2C2</i>   |
|               | <i>ZBTB33</i>   |             | <i>MEGF9</i>    |
|               | <i>ARHGEF2</i>  |             | <i>TMEM49</i>   |
|               | <i>TEAD2</i>    |             | <i>CCDC125</i>  |
|               | <i>ZZZ3</i>     |             | <i>KDM5B</i>    |
|               | <i>SPRED1</i>   |             | <i>ANKRD50</i>  |

|                 |                |
|-----------------|----------------|
| <i>CMPK1</i>    | <i>PCDH20</i>  |
| <i>KIAA0353</i> | <i>MUCL1</i>   |
| <i>UHMK1</i>    | <i>SYNPO2</i>  |
| <i>DSTN</i>     | <i>APPBP2</i>  |
| <i>FAM13B</i>   | <i>GPRIN3</i>  |
| <i>ECI2</i>     | <i>EPS8</i>    |
| <i>COX7B</i>    | <i>LRRC59</i>  |
| <i>NLRP2</i>    | <i>ABCC4</i>   |
| <i>SLC26A3</i>  | <i>CPE</i>     |
| <i>SLC12A2</i>  | <i>ASPN</i>    |
| <i>GTF2H5</i>   | <i>REEP1</i>   |
| <i>DBI</i>      | <i>SORD</i>    |
| <i>SMARCC1</i>  | <i>BMP7</i>    |
| <i>CUL4A</i>    | <i>HEATR6</i>  |
| <i>CRABP2</i>   | <i>XIST</i>    |
| <i>LRRC1</i>    | <i>ANKRD22</i> |
| <i>AK130741</i> | <i>GRIP1</i>   |
| <i>DHX15</i>    | <i>NFIA</i>    |
| <i>EFNB2</i>    | <i>PLEKHA6</i> |
| <i>ENPP5</i>    | <i>MSMB</i>    |
| <i>MTPN</i>     | <i>TGFB3</i>   |
| <i>CCDC6</i>    | <i>CACNA1H</i> |
| <i>DDX3X</i>    | <i>TMEM63C</i> |
| <i>TM9SF3</i>   | <i>USP32</i>   |
| <i>CADPS2</i>   | <i>ODZ2</i>    |
| <i>C6orf115</i> |                |
| <i>RHOA</i>     |                |
| <i>PTEN</i>     |                |
| <i>SH3BP4</i>   |                |
| <i>TJP1</i>     |                |



**Table S3:** Down-regulated genes from the top 500 DEGs for each comparison by WAD score

| <b>METABRIC</b>  | <b>METABRIC</b> | <b>METABRIC</b>    | <b>TCGA</b>      |
|------------------|-----------------|--------------------|------------------|
| <b>ERBB2amp</b>  | <b>ERBB2mut</b> | <b>oncERBB2mut</b> | <b>HER2+</b>     |
| <i>S100A13</i>   | <i>KCTD12</i>   | <i>PSMC1</i>       | <i>SGK223</i>    |
| <i>ATP1B1</i>    | <i>HIST2H4B</i> | <i>HERPUD1</i>     | <i>HIST1H2BJ</i> |
| <i>PMP22</i>     | <i>ATF3</i>     | <i>KIAA1949</i>    | <i>PTPN20B</i>   |
| <i>CTNNB1</i>    | <i>ATG4B</i>    | <i>IRF1</i>        | <i>ABLIM2</i>    |
| <i>PDZK1</i>     | <i>UBC</i>      | <i>TPM3</i>        | <i>SLC6A9</i>    |
| <i>DNAJB6</i>    | <i>TCEAL1</i>   | <i>LIPA</i>        | <i>SELM</i>      |
| <i>EEF1A1</i>    | <i>TXNDC5</i>   | <i>VAMP5</i>       | <i>C8orf46</i>   |
| <i>SNHG5</i>     | <i>PLAU</i>     | <i>GIMAP7</i>      | <i>SDC2</i>      |
| <i>FSIP1</i>     | <i>IFI30</i>    | <i>GNLY</i>        | <i>CPXM2</i>     |
| <i>ISCU</i>      | <i>DCTN3</i>    | <i>MAF</i>         | <i>FADS3</i>     |
| <i>IFITM3</i>    | <i>GYPC</i>     | <i>IGFLR1</i>      | <i>MAPK12</i>    |
| <i>NFE2L2</i>    | <i>EIF4A1</i>   | <i>C10orf116</i>   | <i>ACP5</i>      |
| <i>MBOAT1</i>    | <i>SMPDL3A</i>  | <i>FTL</i>         | <i>ZNF439</i>    |
| <i>MTCP1NB</i>   | <i>FAIM3</i>    | <i>CRTAP</i>       | <i>SYN1</i>      |
| <i>IAH1</i>      | <i>IGSF6</i>    | <i>FKBP11</i>      | <i>DIRAS1</i>    |
| <i>ALDH6A1</i>   | <i>LAPTM5</i>   | <i>C9orf46</i>     | <i>GSTP1</i>     |
| <i>HSPB11</i>    | <i>HBEGF</i>    | <i>MGC87042</i>    | <i>PDE4A</i>     |
| <i>GNG11</i>     | <i>DISC1</i>    | <i>FSTL1</i>       | <i>TRIM9</i>     |
| <i>PSMC1</i>     | <i>FKBP14</i>   | <i>CPXM2</i>       | <i>A4GALT</i>    |
| <i>PDGFRL</i>    | <i>IRF1</i>     | <i>RBP7</i>        | <i>TSPYL5</i>    |
| <i>TCTN3</i>     | <i>HLA-E</i>    | <i>LYN</i>         | <i>NELL2</i>     |
| <i>GZMK</i>      | <i>PGAM1</i>    | <i>EPDR1</i>       | <i>RTP4</i>      |
| <i>HNRNPR</i>    | <i>TPM3</i>     | <i>ARF4</i>        | <i>STAC</i>      |
| <i>CCL15</i>     | <i>CPXM2</i>    | <i>RRAS</i>        | <i>PANX2</i>     |
| <i>LOC401397</i> | <i>CX3CR1</i>   | <i>PODN</i>        | <i>ARHGEF19</i>  |
| <i>RNF13</i>     | <i>RARRES3</i>  | <i>C1orf151</i>    | <i>PTHLH</i>     |
| <i>ARF4</i>      | <i>CD86</i>     | <i>NEDD8</i>       | <i>SLPI</i>      |
| <i>GPR34</i>     | <i>IRX3</i>     | <i>PLAT</i>        | <i>CAND2</i>     |
| <i>CTSK</i>      | <i>TMED9</i>    | <i>GZMA</i>        | <i>RTN4RL1</i>   |
| <i>HSD17B11</i>  | <i>KDEL2</i>    | <i>FOXC1</i>       | <i>LTBP3</i>     |
| <i>FGD3</i>      | <i>ACOT2</i>    | <i>QPCT</i>        | <i>APBB1</i>     |
| <i>PRNP</i>      | <i>IL10RB</i>   | <i>RIPK2</i>       | <i>SETBP1</i>    |
| <i>GPNMB</i>     | <i>ADAP2</i>    | <i>PFKP</i>        | <i>RBM24</i>     |
| <i>COMMD10</i>   | <i>ALDH3A2</i>  | <i>KDEL2</i>       | <i>ADCY9</i>     |
| <i>SLC7A2</i>    | <i>SLC2A3</i>   | <i>LGALS1</i>      | <i>KCTD14</i>    |

|          |          |          |           |
|----------|----------|----------|-----------|
| OAT      | CST1     | SIK1     | VANGL2    |
| IGFBP6   | CTGF     | CYP4B1   | CALML5    |
| RNU11    | UGCG     | MS4A7    | GPT       |
| SELM     | EVI2B    | LY6E     | REEP2     |
| CFH      | PRIC285  | RPL8     | ACOT11    |
| TMEM14A  | ITM2B    | FILIP1L  | HDAC5     |
| SESTD1   | SRSF10   | SERPINH1 | ARHGEF10L |
| CSAD     | TMEM140  | DPT      | CD44      |
| RPL21    | FST      | IGFBP7   | KLHL21    |
| ASH2L    | RAB5C    | CD248    | ATHL1     |
| HSD17B4  | TTC39C   | AKR1B1   | FBXL16    |
| JUNB     | ECHDC3   | PAPD5    | C4orf7    |
| RASD1    | TIMP3    | SGCE     | KCNN4     |
| BNIP3L   | LDOC1    | DRAM1    | NRBP2     |
| PGCP     | LST1     | GPX1     | TACSTD2   |
| TMED10   | RAD51C   | KRT19    | CDSN      |
| CIDEC    | PPIC     | C3       | PAM       |
| ARPC3    | SELS     | IFI30    | PGR       |
| C1S      | C1orf162 | ALDH1A1  | MMP9      |
| ANKRD30A | GRB2     | ITM2C    | TRIM47    |
| NFU1     | IGFBP4   | SLC7A2   | CDHR3     |
| SDCBP    | SLC7A5   | CEBPB    | UBXN11    |
| CCL3     | TMEM14A  | CLIC6    | BCL11A    |
| RBBP4    | S100A4   | S100P    | COL9A3    |
| SIAH2    | DOCK2    | GGH      | PLOD3     |
| NDUFS4   | MAP1LC3A | CD2      | CSF3R     |
| ARMC10   | GADD45B  | ANXA2    | AGTRAP    |
| TCEA3    | SPATS2L  | DOCK2    | TCIRG1    |
| ELOVL5   | PIGT     | COL3A1   | FLNB      |
| SEC23B   | SLC15A3  | EVI2B    | LGR6      |
| LITAF    | CISD1    | PRDX4    | PRRT2     |
| ARL1     | CXCL12   | CFH      | SCARA3    |
| TNFAIP6  | UBD      | ALDH3A2  | NDRG2     |
| C6orf48  | CREG1    | TIMP1    | TAT       |
| NSA2     | TBXAS1   | BHLHE40  | PLEKHG4   |
| PPIC     | CRTAP    | ID3      | STEAP3    |
| CD52     | PDGFRL   | CD79A    | PLCH2     |
| HERPUD1  | PLEK     | FST      | TNFRSF14  |

|                 |                 |                   |                 |
|-----------------|-----------------|-------------------|-----------------|
| <i>FCGR2A</i>   | <i>TRIB1</i>    | <i>ANGPTL4</i>    | <i>ERRF1</i>    |
| <i>C13orf15</i> | <i>FNDC1</i>    | <i>TMED4</i>      | <i>KRT14</i>    |
| <i>ACYP2</i>    | <i>PSMC4</i>    | <i>FNDC1</i>      | <i>MAPK15</i>   |
| <i>ITM2A</i>    | <i>TFF1</i>     | <i>NCRNA00152</i> | <i>CCDC74B</i>  |
| <i>RPL26</i>    | <i>CXCR7</i>    | <i>CTSB</i>       | <i>DUOX1</i>    |
| <i>FCGBP</i>    | <i>FPR1</i>     | <i>CD68</i>       | <i>HIST2H4A</i> |
| <i>EGR2</i>     | <i>TMEM119</i>  | <i>THOC4</i>      | <i>IL22RA1</i>  |
| <i>SRPX</i>     | <i>LY6E</i>     | <i>CD86</i>       | <i>SDK2</i>     |
| <i>PHLDA1</i>   | <i>LYN</i>      | <i>RAC2</i>       | <i>GSDMD</i>    |
| <i>PODN</i>     | <i>CSF2RA</i>   | <i>IGLL3P</i>     | <i>C10orf10</i> |
| <i>METTL5</i>   | <i>FKBP1A</i>   | <i>IL32</i>       | <i>SPP1</i>     |
| <i>SPP1</i>     | <i>SLC7A7</i>   | <i>CAV2</i>       | <i>PI15</i>     |
| <i>GYPC</i>     | <i>PSMB8</i>    | <i>CXCL16</i>     | <i>KLK11</i>    |
| <i>TPM1</i>     | <i>NGRN</i>     | <i>NNMT</i>       | <i>KRT6B</i>    |
| <i>TCEA1</i>    | <i>HERPUD1</i>  | <i>MMP11</i>      | <i>KRT15</i>    |
| <i>SRSF10</i>   | <i>AIF1</i>     | <i>HLA-DOA</i>    | <i>CD164L2</i>  |
| <i>GSTM2</i>    | <i>ARPC3</i>    | <i>PPIC</i>       | <i>COL22A1</i>  |
| <i>UBE2L6</i>   | <i>RET</i>      | <i>KLF6</i>       | <i>CD320</i>    |
| <i>TIMP3</i>    | <i>AGTR1</i>    | <i>NKG7</i>       | <i>SHC4</i>     |
| <i>NR4A2</i>    | <i>ARF4</i>     | <i>RAD51C</i>     | <i>PHLDA1</i>   |
| <i>TSC22D1</i>  | <i>RAB32</i>    | <i>C13orf15</i>   | <i>ESPN</i>     |
| <i>MGC87042</i> | <i>PLOD2</i>    | <i>BTG3</i>       | <i>FOXC1</i>    |
| <i>PLBD1</i>    | <i>PSMC1</i>    | <i>COL6A1</i>     | <i>CDON</i>     |
| <i>C4B</i>      | <i>CRISPLD2</i> | <i>GEM</i>        | <i>SAA1</i>     |
| <i>ADH1A</i>    | <i>QPCT</i>     | <i>FPR1</i>       | <i>RGMA</i>     |
| <i>CCL2</i>     | <i>PTPN1</i>    | <i>PQLC3</i>      | <i>CITED1</i>   |
| <i>DQ896551</i> | <i>PPAPDC1B</i> | <i>HLA-DMB</i>    | <i>PPP4R4</i>   |
| <i>PLIN4</i>    | <i>C3</i>       | <i>TCRVB</i>      | <i>DSC3</i>     |
| <i>ZFAND6</i>   | <i>GCLM</i>     | <i>FERMT3</i>     | <i>PLOD1</i>    |
| <i>THBS1</i>    | <i>TCRA</i>     | <i>SPCS2</i>      | <i>VTCN1</i>    |
| <i>RUNDC1</i>   | <i>TSPAN3</i>   | <i>SUSD3</i>      | <i>FOXI1</i>    |
| <i>LHFP</i>     | <i>ACP5</i>     | <i>ACO1</i>       | <i>CA2</i>      |
| <i>C10orf32</i> | <i>NINJ2</i>    | <i>PXMP2</i>      | <i>ECE1</i>     |
| <i>FUCA1</i>    | <i>PLA2G16</i>  | <i>IGFBP4</i>     | <i>IRAK1</i>    |
| <i>VBP1</i>     | <i>RGS16</i>    | <i>CD3D</i>       | <i>CRABP1</i>   |
| <i>ATP6V0E1</i> | <i>CSF1R</i>    | <i>GBP1</i>       | <i>CX3CL1</i>   |
| <i>BEX2</i>     | <i>C2CD4B</i>   | <i>SERPINE1</i>   | <i>CRIM1</i>    |
| <i>AKR1B1</i>   | <i>FOLR2</i>    | <i>DQ896551</i>   | <i>SOSTDC1</i>  |

|          |          |          |                            |
|----------|----------|----------|----------------------------|
| SYF2     | CYBA     | GAS1     | SERPINA6                   |
| IGFBP7   | LIPA     | CREG1    | HRASLS5                    |
| SUB1     | WISP2    | CD83     | SGK3                       |
| CYB5A    | STOM     | PHYH     | LYPD5                      |
| NELL2    | CMTM8    | HLA-DPB1 | PTPRU                      |
| C3orf10  | HLA-DOA  | CALB2    | PGCP                       |
| ESD      | GLRB     | ECHDC3   | PDZK1IP1                   |
| OCIAD1   | C11orf96 | UBE2L6   | RCOR2                      |
| PDK4     | COL12A1  | PEMT     | KLK10                      |
| JUN      | GLIPR1   | ATP6V1B1 | MYH14                      |
| TMEM59   | IFIT1    | CSF1R    | PROM1                      |
| TSG101   | SPP1     | FAP      | KAZ                        |
| RSL1D1   | CTSL1    | RNASE6   | BAI2                       |
| TMEM126A | SNAR-A3  | MDK      | NEK10                      |
| ZG16B    | IGLL1    | RDH10    | TMEM139                    |
| CNIH     | SPCS2    | SLC7A7   | FUT2                       |
| FAM129A  | CTSB     | IL6      | IL27RA                     |
| KLHL5    | GNG10    | JUN      | PYGL                       |
| NGFRAP1  | HLA-DMA  | RGS16    | CBLC                       |
| AGR2     | C1orf151 | SLC16A3  | RAMP3                      |
| LAMP2    | SERINC3  | GADD45B  | HIST2H2BE                  |
| RGS2     | SMOC2    | C1orf162 | GNA15                      |
| GEM      | KDELR3   | CMTM7    | MAOA                       |
| CD151    | GRIA2    | TMEM119  | MESP1                      |
| PSMG2    | HCST     | EPSTI1   | SLC34A2                    |
| F13A1    | HCLS1    | COL5A2   | MIA                        |
| ANXA1    | MZB1     | GYPC     | MGP                        |
| CD14     | MMP9     | TGFBI    | SYT8                       |
| ALG13    | COL11A1  | EIF4A1   | NFASC                      |
| MT1E     | FAM174A  | S100A16  | RLTPR                      |
| RNASE6   | BHLHE40  | CAV1     | NFIX                       |
| ACADM    | RNU11    | LAPTM5   | AGRN                       |
| SH3BGRL  | RASD1    | PLEK     | CBS                        |
| NFIX     | EIF4H    | SERPING1 | S100A6                     |
| MS4A7    | FAM134B  | EGR2     | PPAN <sub>xyx</sub> P2RY11 |
| PLA2G16  | EPSTI1   | SLC15A3  | STC2                       |
| ITPR1    | SLC7A2   | NINJ2    | RTN1                       |
| SEZ6L2   | RNASE6   | CTSG     | MALL                       |

|           |           |          |            |
|-----------|-----------|----------|------------|
| TGFBR3    | COL8A1    | HCLS1    | EFNA5      |
| SERINC3   | FCGRT     | TXNDC5   | ZNF385B    |
| AIF1      | C1QA      | GNG10    | PKP1       |
| VPS25     | TAP1      | FAM164A  | GRIA2      |
| FCGRT     | HM13      | NDRG1    | CKB        |
| CUTA      | CPA3      | PITX1    | PLCE1      |
| WNK4      | STC1      | TAP1     | LAMB3      |
| UGCG      | CTSK      | GPX3     | NYNRIN     |
| HNMT      | BRI3      | THRSP    | C1orf130   |
| PLEKHB2   | SFRP2     | ANXA1    | AHNAK2     |
| CCL3L3    | HIST1H2AC | SMOC2    | FAM46B     |
| GLRB      | CD68      | PLBD1    | NBPF4      |
| NPEPPS    | HLA-DPB1  | FAIM3    | HIST2H2AA3 |
| DCTN6     | SYT13     | GPNMB    | ZSCAN18    |
| GJA1      | CD83      | EGR1     | BST2       |
| HNRNPA1L2 | LGMN      | IER3     | TF         |
| CD74      | AKR1B1    | TAGLN    | C15orf48   |
| DISC1     | CTSC      | IFI6     | SFRP1      |
| EIF4H     | PLAUR     | NMB      | CTSD       |
| TMED4     | APOC1     | PIM2     | TM4SF1     |
| MAOA      | TNFAIP6   | SLCO2B1  | ENO2       |
| PKIB      | JUNB      | IGJ      | CDK18      |
| STOM      | RAB31     | BRI3     | ADCY1      |
| FABP4     | CCL8      | RNU11    | CYP4F11    |
| CILP      | SLCO2B1   | GRN      | CHI3L1     |
| TSPAN3    | PHYH      | FPR3     | TTC22      |
| C11orf1   | LAPTM4B   | RASD1    | TUBB3      |
| PAIP2     | PTGES     | CCL3     | IL34       |
| RPL22     | CILP      | AIF1     | ZNF238     |
| PIGY      | DCN       | ISG15    | ANGPTL4    |
| PXMP2     | TMED4     | LGALS3BP | SUSD3      |
| FCER1A    | UBE2L6    | PDGFRL   | DMKN       |
| SMOC2     | HIST2H2AC | PTGES    | CAPG       |
| PROSC     | TNFSF13B  | MXRA5    | PGBD5      |
| ITM2B     | PLAT      | S100A8   | TUBA4A     |
| COLEC12   | CCL3      | CTSC     | LPPR3      |
| RAB5C     | ZFP36     | MRPS30   | MAPK8IP2   |
| CFB       | PKIB      | C11orf96 | C19orf33   |

|                    |            |          |          |
|--------------------|------------|----------|----------|
| CHMP5              | CFD        | GZMK     | LY6E     |
| SGCE               | MFAP5      | S100A6   | MFSD6L   |
| CCL4               | HIST2H2AA4 | MT1E     | APOBEC3B |
| HLA-A              | GPR183     | RAB32    | FXYD5    |
| SYBU               | FGL2       | SLC2A3   | CELSR2   |
| BMPR1B             | HLA-B      | EMP3     | TMEM101  |
| GNG10              | CXCL9      | C2CD4B   | SCNN1G   |
| AFF3               | C1R        | SOD2     | FAM198A  |
| CRYAB              | FCGR2A     | CXCR7    | ELF5     |
| SPCS2              | PLEKHB2    | TRIB1    | DBNDD2   |
| C1QB               | GRN        | GLIPR1   | FGD3     |
| ALDH1A1            | MYC        | PHLDA1   | WNK2     |
| CHPT1              | CD163      | SAA1     | PMAIP1   |
| SRP9               | CEBPD      | TIMP3    | GPRIN2   |
| IFI6               | HLA-DRA    | FOLR2    | C10orf81 |
| RBP7               | CXCR4      | COL8A1   | CA11     |
| TMEM119            | ITGB2      | CILP     | NDRG1    |
| LIPA               | PSMB9      | COL12A1  | ARTN     |
| IGFBP4             | MRPS30     | C1S      | C1orf173 |
| C10orf32-<br>AS3MT | CPVL       | HLA-B    | FAM20C   |
| LOC100506144       | CCL3L3     | PLAUR    | PLEKHB1  |
| CTSG               | EFEMP1     | HLA-DMA  | SOX10    |
| PPAP2A             | LGALS3BP   | COMP     | HR       |
| DNALI1             | CCL4       | F13A1    | SPEG     |
| PLAC9              | ISG15      | LGMN     | GABRP    |
| HLA-DPA1           | FCER1G     | C1QA     | COL2A1   |
| RNASE1             | FCGR1B     | PLTP     | LYNX1    |
| IGJ                | C15orf48   | PLAU     | KCNK5    |
| TMEM14C            | SFRP4      | FCGR2A   | AZGP1    |
| ASB13              | TPSAB1     | FCGR1B   | CRYAB    |
| MMADHC             | CXCL10     | JUNB     | EEF1A2   |
| CRTAP              | MS4A6A     | HCST     | NTN1     |
| FGL2               | CYR61      | MZB1     | GRB14    |
| C3                 | CD14       | SPP1     | KRT16    |
| ATF3               | C1QC       | C15orf48 | SORBS2   |
| PIGT               | HLA-DPA1   | PSMB9    | TNNT1    |
| CTGF               | CD74       | TNFSF13B | AGT      |

|          |                |          |          |
|----------|----------------|----------|----------|
| CCNDBP1  | COL10A1        | COL11A1  | SECTM1   |
| GPR183   | IFI27          | FABP5    | MUC16    |
| FAM174A  | FOSB           | HLA-DQB1 | CITED4   |
| CEBPD    | BASP1          | IFI27    | ASPHD1   |
| ARMCX1   | TYROBP         | HLA-DRB6 | SFN      |
| SPCS1    | RNASE1         | CTSL1    | FBXO2    |
| CLSTN2   | SRGN           | APOC1    | CHI3L2   |
| CA2      | IFI6           | CXCL12   | CMTM7    |
| CAV1     | DKFZp686O16217 | RARRES2  | SCNN1B   |
| RPS27L   | C1QB           | SERPINA1 | FGFR2    |
| CPB1     | RGS1           | CIDEC    | S100A1   |
| TMEM101  | SERPINA1       | FGL2     | CCDC74A  |
| ZFP36    | HLA-A          | CCL5     | LAMC2    |
| HLA-DRA  | LYZ            | FABP4    | CFB      |
| TYROBP   | FOS            | CRISPLD2 | SERPINA1 |
| DACH1    | HLA-DQA1       | CD74     | MFI2     |
| TCEAL1   | DUSP1          | CTGF     | TFCP2L1  |
| CPVL     | abParts        | RAB31    | NPY1R    |
| CD163    | CDH1           | ADM      | FCGBP    |
| abParts  | HBA2           | LUM      | TMPRSS3  |
| BTF3     | HBB            | SFRP2    | SEZ6L2   |
| ALOX5AP  |                | WISP2    | MUC5B    |
| C1R      |                | LAPTM4B  | ANPEP    |
| FCER1G   |                | CCL3L3   | WFDC2    |
| RBBP8    |                | MFAP5    | SERPINA3 |
| CD36     |                | C1R      | KRT23    |
| PRDX3    |                | CCL2     |          |
| HLA-DQA1 |                | ITGB2    |          |
| CREG1    |                | COL1A1   |          |
| GATA3    |                | CD36     |          |
| SEPP1    |                | FCGRT    |          |
| BHLHE40  |                | CCL4     |          |
| CX3CR1   |                | HLA-DRB1 |          |
| C15orf48 |                | TNFAIP6  |          |
| TBC1D9   |                | CEBPD    |          |
| LUM      |                | CPA3     |          |
| QDPR     |                | EFEMP1   |          |
| MS4A6A   |                | HLA-DRA  |          |

|                  |                 |
|------------------|-----------------|
| <i>MYC</i>       | <i>COL1A2</i>   |
| <i>SRGN</i>      | <i>GPR183</i>   |
| <i>HIST1H2AC</i> | <i>CPVL</i>     |
| <i>CST3</i>      | <i>CYBA</i>     |
| <i>MGP</i>       | <i>ZFP36</i>    |
| <i>BCL2</i>      | <i>S100A4</i>   |
| <i>FAM134B</i>   | <i>MS4A6A</i>   |
| <i>CXCR4</i>     | <i>CTSK</i>     |
| <i>EFEMP1</i>    | <i>HLA-DPA1</i> |
| <i>C9orf46</i>   | <i>CXCL9</i>    |
| <i>IL6ST</i>     | <i>DCN</i>      |
| <i>CITED4</i>    | <i>COL10A1</i>  |
| <i>GFRA1</i>     | <i>C1QC</i>     |
| <i>TPSAB1</i>    | <i>PLOD2</i>    |
| <i>CYBRD1</i>    | <i>PLIN2</i>    |
| <i>LYZ</i>       | <i>CXCR4</i>    |
| <i>CXCL12</i>    | <i>MMP9</i>     |
| <i>CFD</i>       | <i>PLIN4</i>    |
| <i>SPARCL1</i>   | <i>CD52</i>     |
| <i>SFRP2</i>     | <i>CFD</i>      |
| <i>ANG</i>       | <i>FCER1G</i>   |
| <i>RGS1</i>      | <i>ATF3</i>     |
| <i>THBS4</i>     | <i>CD163</i>    |
| <i>TFF1</i>      | <i>SRGN</i>     |
| <i>C1orf64</i>   | <i>UBD</i>      |
| <i>SUSD3</i>     | <i>MYC</i>      |
| <i>SCUBE2</i>    | <i>SFRP4</i>    |
| <i>SLC39A6</i>   | <i>CXCL10</i>   |
| <i>SERPINA1</i>  | <i>S100A9</i>   |
| <i>MRPS30</i>    | <i>TYROBP</i>   |
| <i>CPA3</i>      | <i>TPSAB1</i>   |
| <i>BTG2</i>      | <i>CCL8</i>     |
| <i>HBA2</i>      | <i>CD14</i>     |
| <i>SFRP4</i>     | <i>RNASE1</i>   |
| <i>CYR61</i>     | <i>C1QB</i>     |
| <i>DCN</i>       | <i>HLA-A</i>    |
| <i>MAPT</i>      | <i>RGS1</i>     |
| <i>CA12</i>      | <i>FOSB</i>     |



|                 |                       |
|-----------------|-----------------------|
| <i>STC2</i>     | <i>CYR61</i>          |
| <i>RERG</i>     | <i>LYZ</i>            |
| <i>EGR1</i>     | <i>HBA2</i>           |
| <i>FOSB</i>     | <i>IGLL1</i>          |
| <i>NAT1</i>     | <i>HBB</i>            |
| <i>HBB</i>      | <i>DUSP1</i>          |
| <i>SERPINA3</i> | <i>FOS</i>            |
| <i>DNAJC12</i>  | <i>HLA-DQA1</i>       |
| <i>DUSP1</i>    | <i>CDH1</i>           |
| <i>ESR1</i>     | <i>DKFZp686O16217</i> |
| <i>FOS</i>      | <i>abParts</i>        |
| <i>AGR3</i>     |                       |
