# Supplementary material for: Targetable ERBB2 mutation status is an independent marker of adverse prognosis in estrogen receptor positive, ERBB2 non-amplified primary lobular breast carcinoma: a retrospective in silico analysis of public datasets
Source: PubMed Central journal article supplement (PMC7422515; doi:10.1186/s13058-020-01324-4), 2020-08-11
Supplement: 13058_2020_1324_MOESM3_ESM.pdf [file 13058_2020_1324_MOESM3_ESM.pdf]

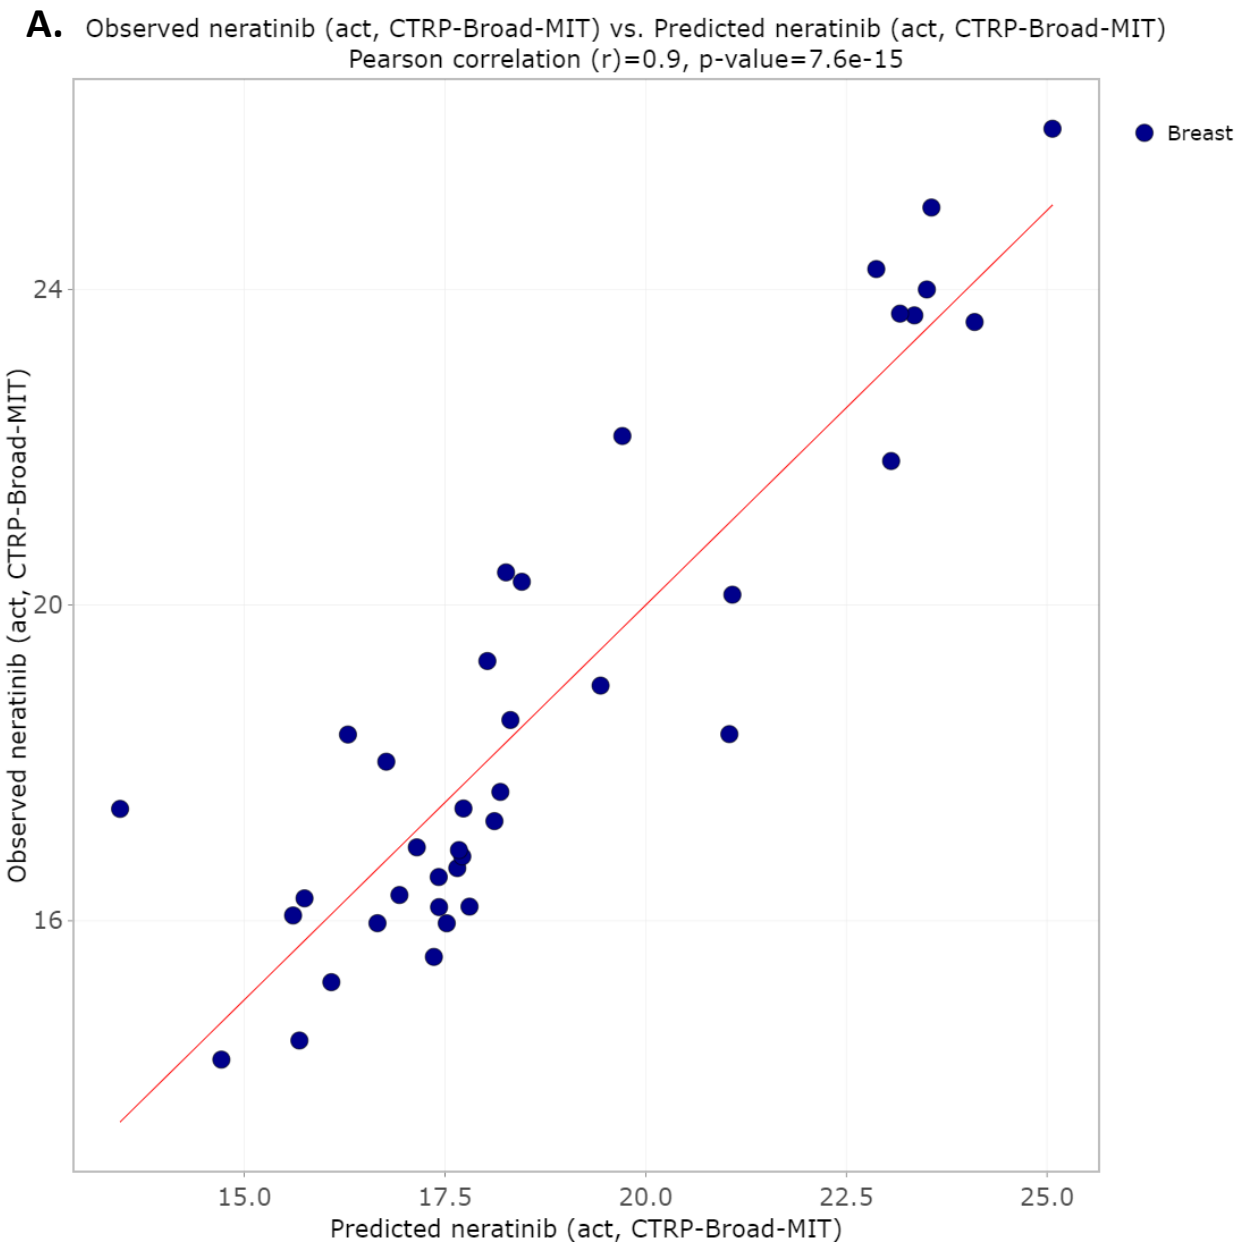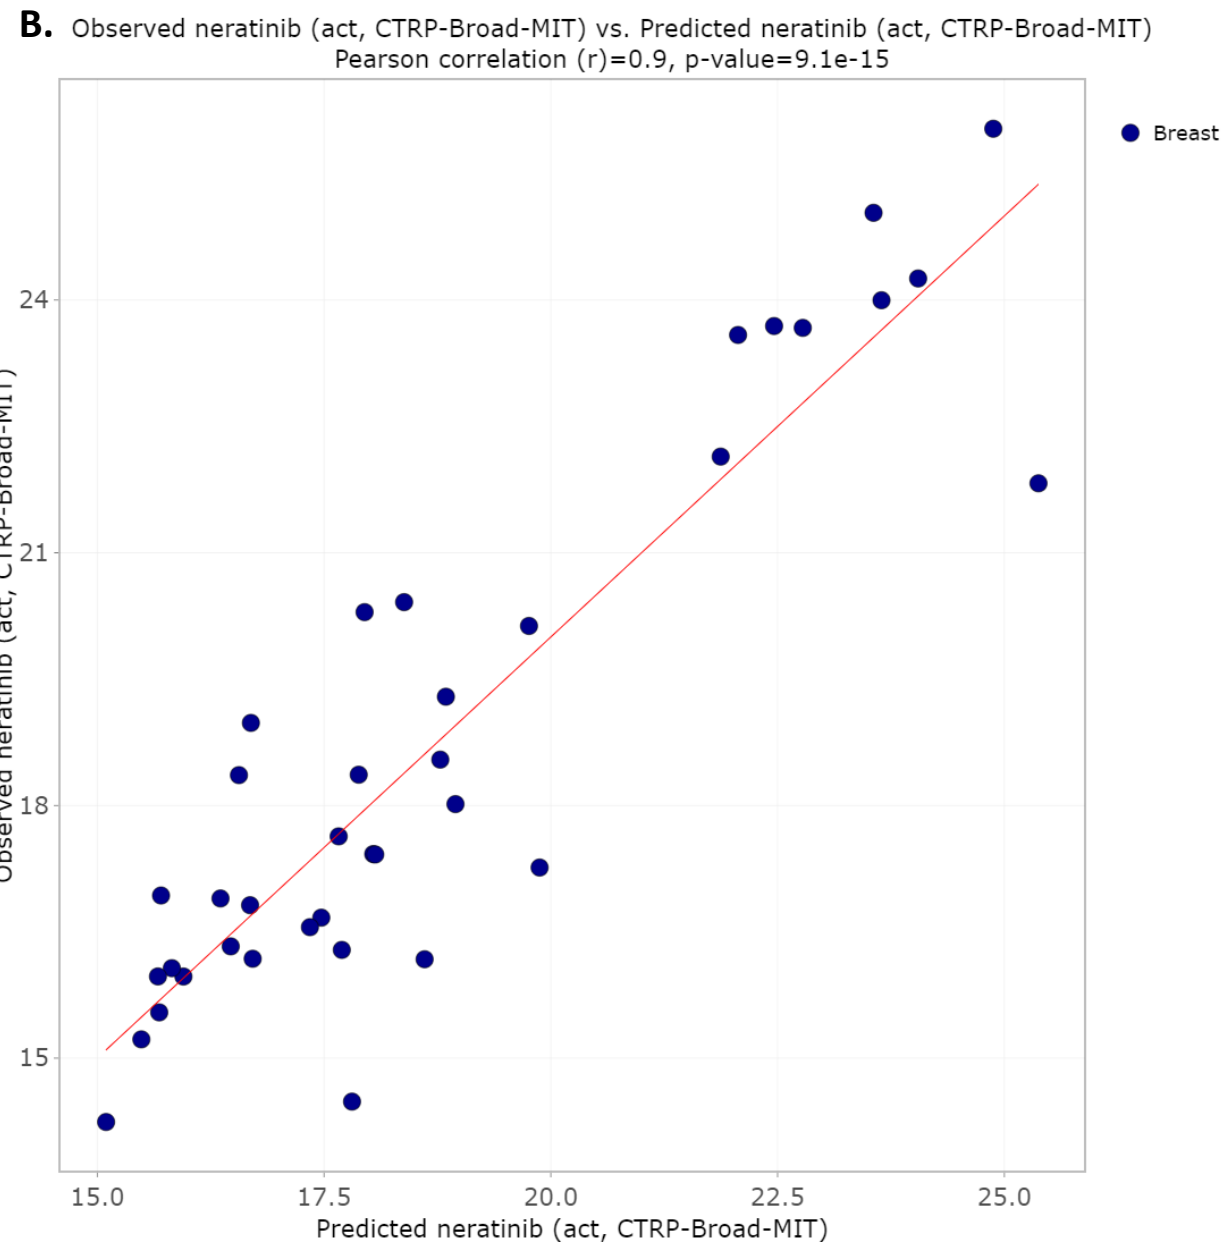

**Figure S2:** observed *versus* predicted response to neratinib in a pharmacogenomic model of 36 breast cancer cell lines, accessed *via* CellminerCDB. Correlations for (A) novel gene signature and (B) gene signature established by Desmedt *et al* 2008 (31) are shown.
